# Supplementary material
Source: PubMed Central journal article supplement (PMC3355658)
Supplement: cb200311s_si_001.pdf [file cb200311s_si_001.pdf]

Supporting Information for

## **Sulfolipid-1 Biosynthesis Restricts *Mycobacterium tuberculosis* Growth in Human Macrophages**

*Sarah A. Gilmore*<sup>\*</sup>, *Michael W. Schelle*<sup>†</sup>, *Cynthia M. Holsclaw*<sup>¶</sup>, *Clifton D. Leigh*<sup>†</sup>, *Madhulika Jain*<sup>□</sup>, *Jeffery S. Cox*<sup>□</sup>, *Julie A. Leary*<sup>¶,§</sup>, and *Carolyn R. Bertozzi*<sup>\*, †, ‡, 1</sup>

Departments of Chemistry<sup>†</sup> and Molecular and Cell Biology<sup>\*</sup>, Howard Hughes Medical Institute<sup>‡</sup>, University of California, Berkeley, CA 94720; Section of Molecular and Cell Biology<sup>¶</sup> and Department of Chemistry<sup>§</sup>, University of California, Davis, CA 95616; and Department of Microbiology and Immunology<sup>□</sup>, University of California, San Francisco, CA 94143.

<sup>1</sup>To whom correspondence may be addressed: University of California, B84 Hildebrand Hall, #1460, Berkeley, CA 94720. Tel: (510) 643-1682. Fax: (510) 643-2628. E-mail: [crb@berkeley.edu](mailto:crb@berkeley.edu)

### **Supplemental Figure Legends**

Figure S1. Model of SL-1 biosynthesis

Free trehalose is sulfated by Stf0 to form T2S. PapA2 then acylates the 2'-position of T2S to form SL<sub>659</sub>. Pks2 synthesizes a (hydroxy)phthioceranic acid which is transferred directly by PapA1 onto SL<sub>659</sub> to form SL<sub>1278</sub>. The diacylated SL<sub>1278</sub> is then transferred by the putative lipid transporter MmpL8 to the exterior of the cell wall where the two final acylation reactions occur to yield fully elaborated SL-1.

Figure S2. MALDI-TOF MS of purified SL-1

SL-1 was enriched by anion-exchange chromatography and further purified via HPLC silica column. SL-1 is observed as a collection of lipofoms that vary in the lengths of their acyl groups ( $\pm 14$  mass units).

Figure S3. SL-1 does not modulate pro-inflammatory cytokine production *in vitro*

hiDCs, human primary macrophages, the human monocyte THP-1 cell line, or the murine macrophage RAW264.7 cell line were cultured with SL-1, SL-A, or LPS. Levels of TNF produced by each cell type in response to the indicated stimulus were evaluated by ELISA. Data are representative of at least two independent experiments performed in triplicate, with human cells derived from different donors where appropriate. Error bars represent the standard deviation from the mean.

Figure S4. Qualitative MS analysis of *stf0* mutant for T2S and PDIM

(a) Disruption of *stf0* abolishes trehalose-2-sulfate (T2S) production. FT-ICR MS of chloroform:methanol extracts of WT,  $\Delta stf0$ , and  $\Delta stf0 + pstf0$  strains verify loss of T2S ( $m/z=421.06$ ), as denoted by an asterisk, from  $\Delta stf0$ . The other species observed in  $\Delta stf0$  and the  $\Delta stf0 + pstf0$  strains is a phosphorylated disaccharide that is not visible in WT samples due to ion suppression that occurs when analyzing complex lipid extracts. (b) PDIM synthesis is intact in the  $\Delta stf0$  mutant. FT-ICR analysis of surface-extractable lipids reveals that PDIM retains the same average  $m/z=1402$  in the  $\Delta stf0$  mutant as compared to WT.

Figure S5.  $\Delta stf0$  displays no *in vitro* growth defects

The *in vitro* growth rates of  $\Delta stf0$ , WT, and  $\Delta stf0 + pstf0$  Mtb were approximated by measuring their optical density at 600 nm over time. Data are representative of three independent experiments.

Figure S6.  $\Delta papA2$  is more resistant to LL-37 compared to WT Mtb.

The indicated strains of Mtb were exposed to increasing concentrations (0, 6.5, and 65  $\mu\text{g/mL}$ ) of LL-37. After 3 days, Mtb viability was measured by plating bacteria on solid agar to enumerate cfu counts. Data are representative three biological replicates. Error bars correspond to the means ( $\pm$  s.d.). \*,  $P=0.329$  (not significant) for the comparison of  $\Delta papA2$  versus WT; \*\*,  $P=0.018$  for the comparison of  $\Delta papA2$  versus WT.

Figure S7. *Stf0* displays no trafficking defects compared to WT *in vivo*

Liver (a) and spleen (b) cfu counts for BALB/c mice infected via aerosol with WT or  $\Delta stf0$  Mtb. Each data point represents the average cfu count from 4-5 mice, and error bars indicate the standard deviation from the mean.

## Table Legend

Table S1. Top 50 most highly upregulated microarray gene identities.

Identities of the 50 most highly up regulated, statistically significant ( $p<0.02$ ) genes induced in hiDCs by SL-1, SL-A, or P3K as represented in Figure 2.

## Supplemental Figures

Figure S1

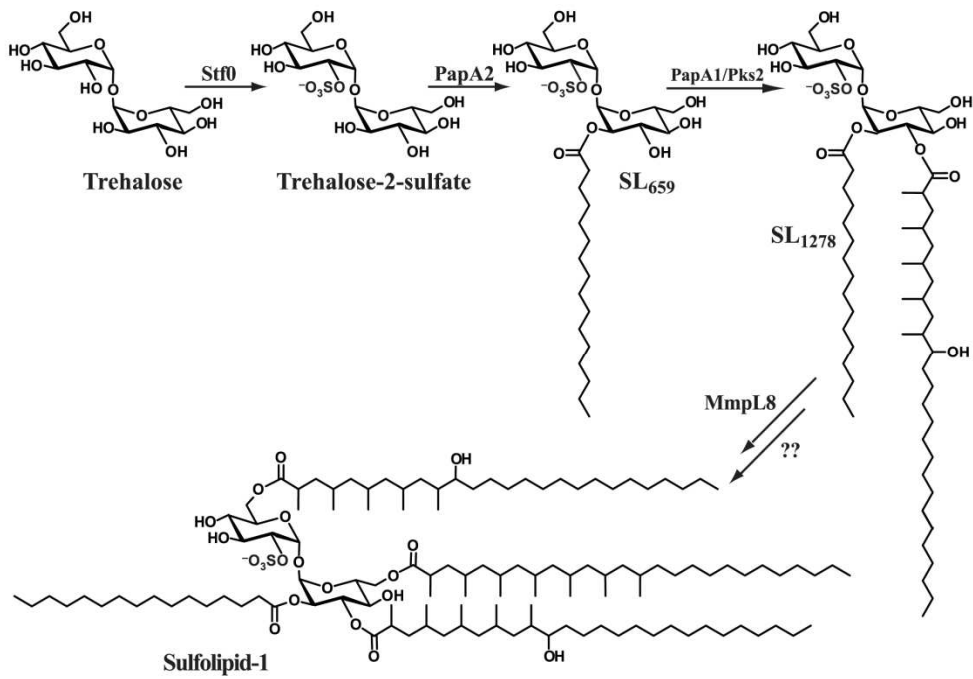

Figure S2

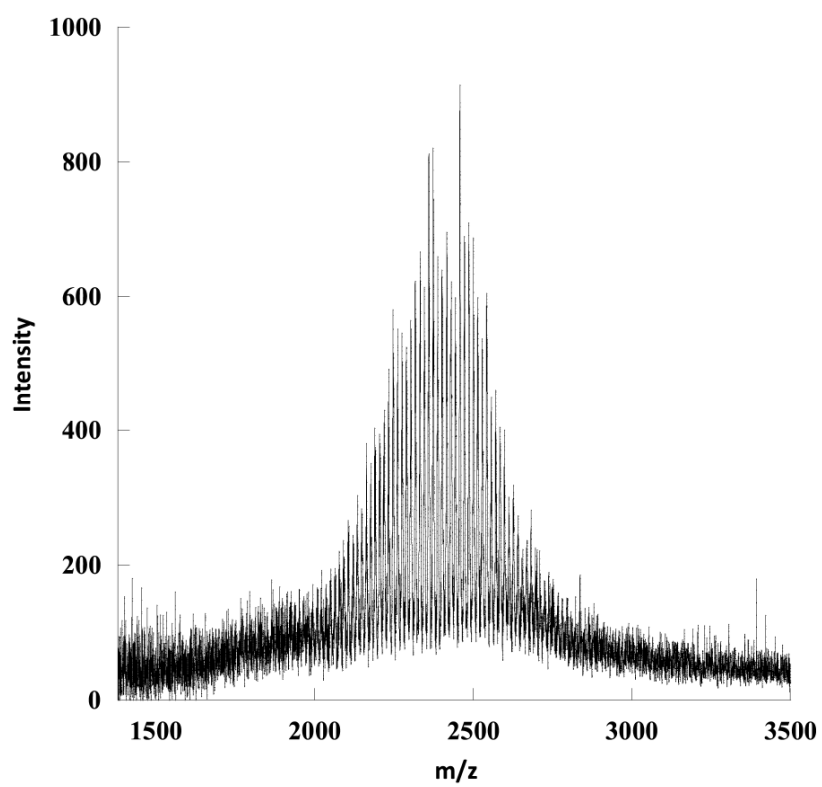

**Figure S3**

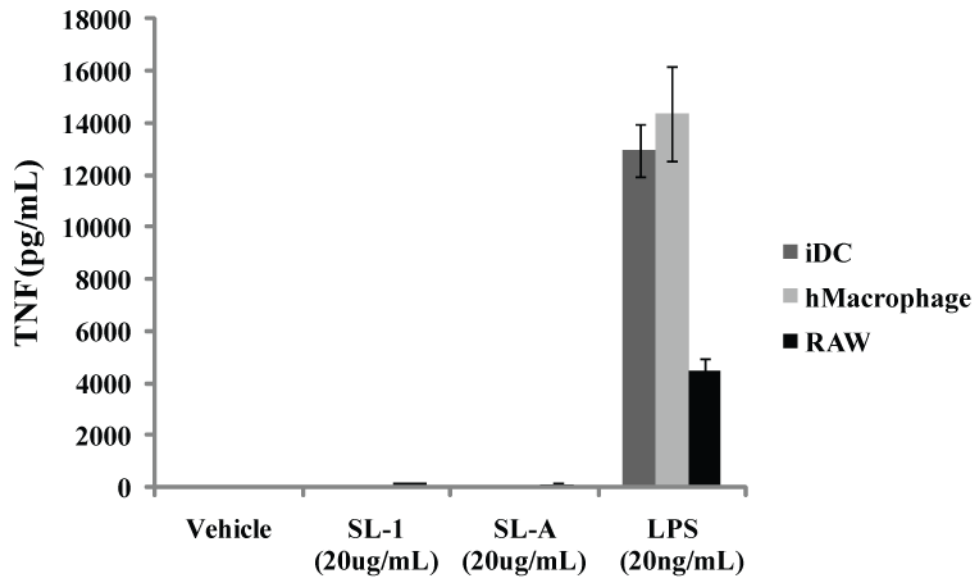

Figure S4.

**A**

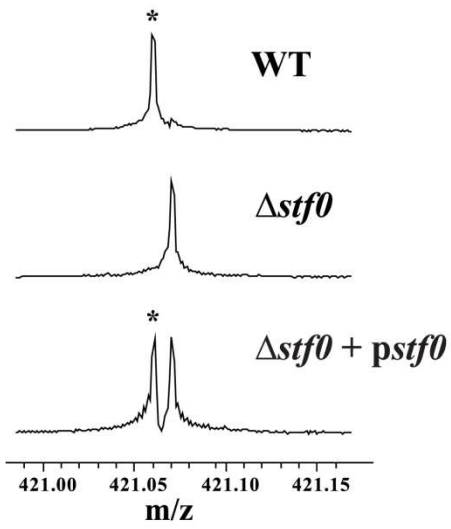

**B**

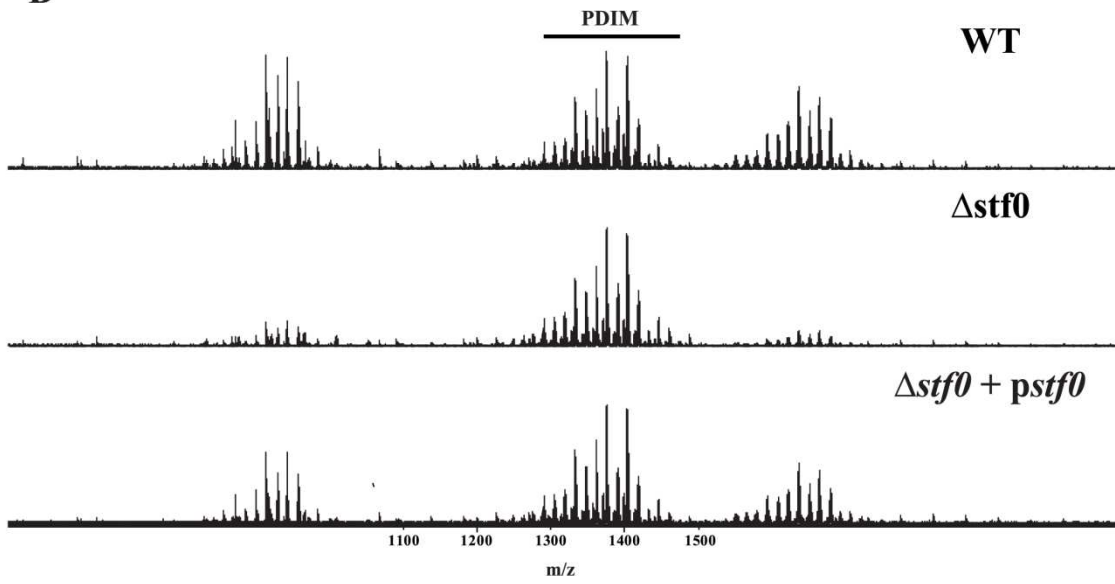

**Figure S5.**

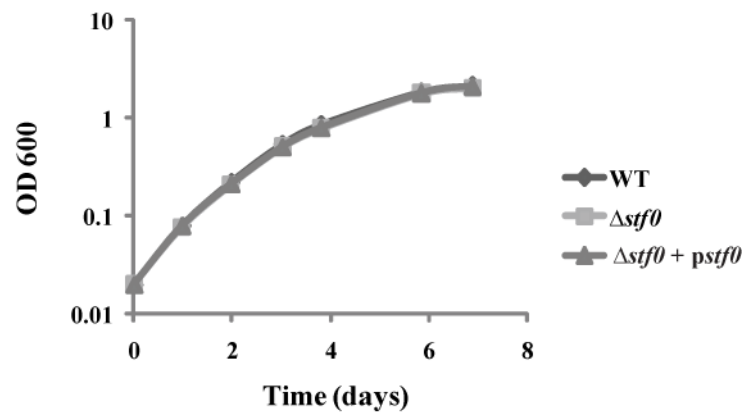

Figure S6

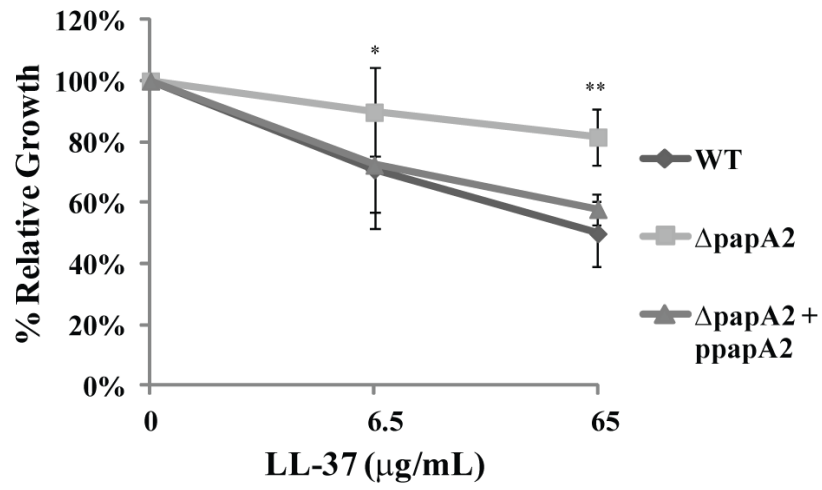

Figure S7



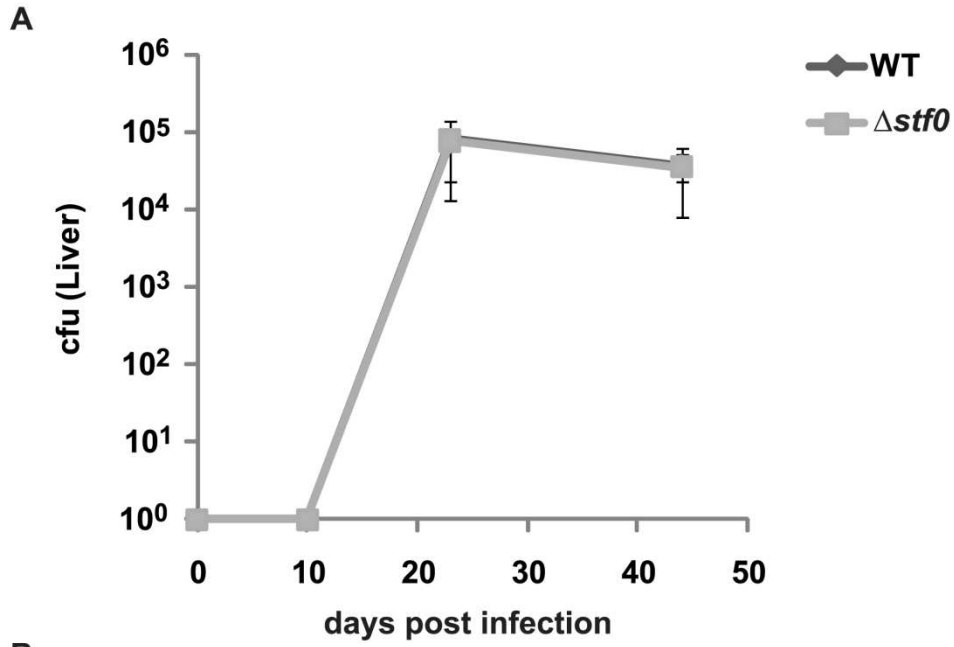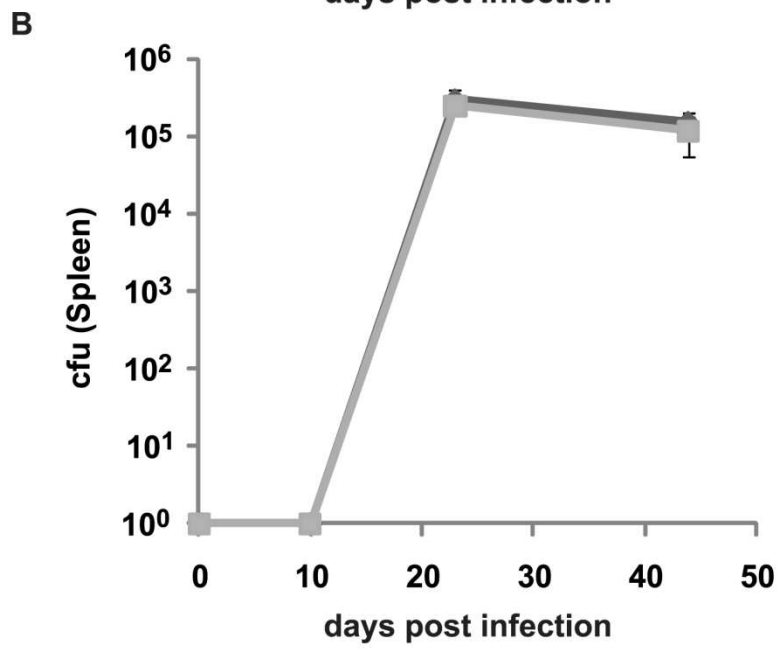

**Table S1.**

| <b>Top 50 genes upregulated in response to P3K</b>  | <b>Gene Name</b>                                          | <b>Gene</b> |
|-----------------------------------------------------|-----------------------------------------------------------|-------------|
| <b>Proinflammatory/vasoactive</b>                   |                                                           |             |
|                                                     | interleukin 6 (interferon, beta 2)                        | IL6         |
|                                                     | interleukin 1, beta                                       | IL1B        |
|                                                     | tumor necrosis factor, alpha-induced protein 6            | TNFAIP6     |
|                                                     | interleukin 8                                             | IL8         |
|                                                     | colony stimulating factor 2 (granulocyte-macrophage)      | CSF2        |
|                                                     | interleukin 1, alpha                                      | IL1A        |
|                                                     | tenascin C (hexabrachion)                                 | TNC         |
|                                                     | plasminogen activator, tissue                             | PLAT        |
|                                                     | serpin peptidase inhibitor, clade B (ovalbumin), member 2 | SERPINB2    |
|                                                     | matrix metalloproteinase 7 (matrilysin, uterine)          | MMP7        |
|                                                     | prostaglandin-endoperoxide synthase 2 (COX-1)             | PTGS2       |
|                                                     | interleukin 1 family, member 9                            | IL1F9       |
|                                                     | tumor necrosis factor (TNF superfamily, member 2)         | TNF         |
|                                                     | GTP cyclohydrolase 1 (dopa-responsive dystonia)           | GCH1        |
|                                                     | tumor necrosis factor, alpha-induced protein 2            | TNFAIP2     |
|                                                     | interleukin 18 receptor 1                                 | IL18R1      |
|                                                     | interleukin 23, alpha subunit p19                         | IL23A       |
|                                                     | sphingosine-1-phosphate phosphatase 2                     | SGPP2       |
|                                                     | glycoprotein Ib (platelet), alpha polypeptide (CD42b)     | GP1BA       |
| <b>Chemotaxis/Cell Migration</b>                    |                                                           |             |
|                                                     | chemokine (C-C motif) ligand 20                           | CCL20       |
|                                                     | chemokine (C-C motif) ligand 1                            | CCL1        |
|                                                     | chemokine (C-X-C motif) ligand 1                          | CXCL1       |
|                                                     | chemokine (C-X-C motif) ligand 3                          | CXCL3       |
|                                                     | chemokine (C-X-C motif) ligand 2                          | CXCL2       |
|                                                     | intercellular adhesion molecule 1 (CD54)                  | ICAM1       |
|                                                     | ADAM metalloproteinase domain 19 (meltrin beta)           | ADAM19      |
| <b>Antigen Presentation/ /T-cell co-stimulation</b> |                                                           |             |
|                                                     | tumor necrosis factor receptor superfamily,               | TNFRSF4     |

|                                                     |                                                                                    |             |
|-----------------------------------------------------|------------------------------------------------------------------------------------|-------------|
|                                                     | member 4 (OX40)                                                                    |             |
|                                                     | pentraxin-related gene, rapidly induced by IL-1 beta                               | PTX3        |
|                                                     | thymic stromal lymphopoietin                                                       | TSLP        |
|                                                     | interleukin 7 receptor                                                             | IL7R        |
| <b>Anti-inflammatory</b>                            |                                                                                    |             |
|                                                     | adenosine A2a receptor                                                             | ADORA2A     |
|                                                     | B-cell CLL/lymphoma 3                                                              | BCL3        |
|                                                     | superoxide dismutase 2, mitochondrial                                              | SOD2        |
|                                                     | TNFAIP3 interacting protein 3                                                      | TNIP3       |
|                                                     | nuclear factor of kappa light polypeptide gene enhancer in B-cells 1 (p105)        | NFKB1       |
|                                                     | nuclear factor of kappa light polypeptide gene enhancer in B-cells inhibitor, zeta | NFKBIZ      |
| <b>Signaling/Metabolism</b>                         |                                                                                    |             |
|                                                     | IBR domain containing 2                                                            | IBRDC2      |
|                                                     | EH-domain containing 1                                                             | EHD1        |
|                                                     | sphingosine-1-phosphate phosphatase 2                                              | SGPP2       |
|                                                     | ankyrin repeat and BTB (POZ) domain containing 2                                   | ABTB2       |
|                                                     | ELOVL family member 7, elongation of long chain fatty acids (yeast)                | ELOVL7      |
|                                                     | shroom                                                                             | SHRM        |
|                                                     | arrestin domain containing 3                                                       | ARRDC3      |
|                                                     | wingless-type MMTV integration site family, member 5A                              | WNT5A       |
|                                                     | baculoviral IAP repeat-containing 3 (cIAP2)                                        | BIRC3       |
|                                                     | guanylate binding protein 3                                                        | GBP3        |
|                                                     | G0/G1 switch 2                                                                     | G0S2        |
|                                                     | RAS guanyl releasing protein 1 (calcium and DAG-regulated)                         | RASGRP1     |
|                                                     | ankyrin repeat domain 15                                                           | ANKRD15     |
|                                                     | Wilms tumor 1 associated protein                                                   | WTAP        |
| <b>Top 50 genes upregulated in response to SL-1</b> | <b>Gene Name</b>                                                                   | <b>Gene</b> |
| <b>Chemotaxis/Cell Migration</b>                    |                                                                                    |             |
|                                                     | fucosyltransferase 7 (alpha (1,3) fucosyltransferase)                              | FUT7        |
|                                                     | integrin, beta 1 ( antigen CD29)                                                   | ITGB1       |
|                                                     | interleukin 8 receptor, beta                                                       | IL8RB       |
|                                                     | cadherin 12, type 2 (N-cadherin 2)                                                 | CDH12       |
|                                                     | hyaluronan and proteoglycan link protein 3                                         | HAPLN3      |

|                                      |                                                               |               |
|--------------------------------------|---------------------------------------------------------------|---------------|
| <b>Metabolism</b>                    |                                                               |               |
|                                      | heat shock protein 90kDa alpha (cytosolic), class A member 1  | HSP90AA1      |
|                                      | pyruvate dehydrogenase kinase, isozyme 4                      | PDK4          |
|                                      | cell division cycle associated 7-like                         | CDCA7L        |
|                                      | aldehyde dehydrogenase (succinate-semialdehyde dehydrogenase) | ALDH5A1       |
|                                      | heme oxygenase (decycling) 1                                  | HMOX1         |
|                                      | paired box gene 8                                             | PAX8          |
|                                      | pericentriolar material 1                                     | PCM1          |
|                                      | transmembrane protein 97                                      | TMEM97        |
|                                      | solute carrier family 26, member 10                           | SLC26A10      |
|                                      | 24-dehydrocholesterol reductase                               | DHCR24        |
| <b>Antigen Presentation</b>          |                                                               |               |
|                                      | CD1d molecule                                                 | CD1D          |
|                                      | CD84 molecule                                                 | CD84          |
|                                      | anti-rabies SO57 immunoglobulin heavy chain                   | IGHG1         |
| <b>Unknown function</b>              |                                                               |               |
|                                      | hypothetical gene supported by AK124070                       | LOC400707     |
|                                      | hypothetical protein FLJ38663                                 | FLJ38663      |
|                                      | chromosome 8 open reading frame 70                            | C8orf70       |
|                                      | hypothetical protein MGC33584                                 | MGC33584      |
|                                      | neuroblastoma breakpoint family, member 11                    | NBPF11        |
|                                      | translocation associated membrane protein 1-like 1            | TRAM1L1       |
|                                      | fibronectin type III domain containing 5                      | FNDC5         |
|                                      | neuroblastoma breakpoint family, member 3                     | NBPF3         |
|                                      | tetratricopeptide repeat domain 23                            | TTC23         |
|                                      | immediate early response 5-like                               | IER5L         |
|                                      | CTAGE family, member 5                                        | CTAGE5        |
|                                      | XAGE-4 protein                                                | RP11-167P23.2 |
|                                      | bromodomain containing 3                                      | BRD3          |
|                                      | trinucleotide repeat containing 15                            | TNRC15        |
| <b>Cell Cytoskeleton/Endocytosis</b> |                                                               |               |
|                                      | tropomyosin 1 (alpha)                                         | TPM1          |
|                                      | villin 2 (ezrin)                                              | VIL2          |
|                                      | sorting nexin 24                                              | SNX24         |
|                                      | membrane protein, palmitoylated 5                             | MPP5          |
|                                      | intersectin 1 (SH3 domain protein)                            | ITSN1         |

|                                                     |                                                                      |             |
|-----------------------------------------------------|----------------------------------------------------------------------|-------------|
| <b>Signaling</b>                                    |                                                                      |             |
|                                                     | protein tyrosine phosphatase, receptor type, N                       | PTPRN       |
|                                                     | RAB32, member RAS oncogene family                                    | RAB32       |
|                                                     | Ras and Rab interactor 1                                             | RIN1        |
|                                                     | sphingolipid G-protein-coupled receptor, 8                           | EDG8        |
|                                                     | GTPase activating protein and VPS9 domains 1                         | GAPVD1      |
|                                                     | protein phosphatase 1, regulatory (inhibitor) subunit 11             | PPP1R11     |
|                                                     | G protein-coupled receptor 120                                       | GPR120      |
|                                                     | ralA binding protein 1                                               | RALBP1      |
|                                                     | protein phosphatase 1, regulatory (inhibitor) subunit 14A            | PPP1R14A    |
|                                                     | SRY (sex determining region Y)-box 17                                | SOX17       |
|                                                     | coiled-coil domain containing 50                                     | CCDC50      |
|                                                     | wingless-type MMTV integration site family, member 5B                | WNT5B       |
|                                                     | fused toes homolog (mouse)                                           | FTS         |
| <b>Top 50 genes upregulated in response to SL-A</b> | <b>Gene Name</b>                                                     | <b>Gene</b> |
| <b>Metabolism/Cell Cycle</b>                        |                                                                      |             |
|                                                     | serine/arginine repetitive matrix 1                                  | SRRM1       |
|                                                     | cytochrome P450, family 2, subfamily C, polypeptide 19               | CYP2C19     |
|                                                     | eukaryotic translation initiation factor 2A, 65kDa                   | EIF2A       |
|                                                     | pericentriolar material 1                                            | PCM1        |
|                                                     | heat shock protein 90kDa alpha (cytosolic), class B member 1         | HSP90AB1    |
|                                                     | heat shock protein 90kDa alpha (cytosolic), class A member 1         | HSP90AA1    |
|                                                     | oxidation resistance 1                                               | OXR1        |
|                                                     | hydroxyacyl-Coenzyme A dehydrogenase                                 | HADHA       |
|                                                     | poly (ADP-ribose) polymerase family, member 14                       | PARP14      |
|                                                     | prothymosin, alpha (gene sequence 28)                                | PTMA        |
|                                                     | N-acetylglucosamine-1-phosphate transferase, alpha and beta subunits | GNPTAB      |
|                                                     | similar to cell division cycle 10 homolog                            | LOC441220   |
|                                                     | Nipped-B homolog (Drosophila)                                        | NIPBL       |
|                                                     | potassium voltage-gated channel, subfamily G, member 1               | KCNG1       |
| <b>Antigen Presentation/Pathogen</b>                |                                                                      |             |

|                                      |                                                                           |            |
|--------------------------------------|---------------------------------------------------------------------------|------------|
| <b>Recognition</b>                   |                                                                           |            |
|                                      | Fc receptor-like 1                                                        | FCRL1      |
|                                      | anti-rabies SO57 immunoglobulin heavy chain                               | IGHG1      |
| <b>Unknown function</b>              |                                                                           |            |
|                                      | chromosome X open reading frame 22                                        | CXorf22    |
|                                      | testicular cell adhesion molecule 1 homolog (mouse)                       | TCAM1      |
|                                      | heat shock protein 90kDa alpha (cytosolic), class B member 3 (pseudogene) | HSP90AB3 P |
|                                      | neuroblastoma breakpoint family, member 3                                 | NBPF3      |
|                                      | hypothetical protein LOC338809                                            | LOC338809  |
|                                      | zinc finger protein 560                                                   | ZNF560     |
|                                      | RNA binding motif protein 24                                              | RBM24      |
|                                      | trinucleotide repeat containing 15                                        | TNRC15     |
|                                      | P antigen family, member 2 (prostate associated)                          | PAGE2      |
|                                      | KIAA0319-like                                                             | KIAA0319L  |
|                                      | hypothetical protein FLJ38663                                             | FLJ38663   |
|                                      | hypothetical protein LOC283874                                            | LOC283874  |
|                                      | chromosome 8 open reading frame 70                                        | C8orf70    |
|                                      | chromosome 20 open reading frame 23                                       | C20orf23   |
| <b>Cell Cytoskeleton/Endocytosis</b> |                                                                           |            |
|                                      | villin 2 (ezrin)                                                          | VIL2       |
|                                      | intersectin 1 (SH3 domain protein)                                        | ITSN1      |
|                                      | tropomyosin 1 (alpha)                                                     | TPM1       |
|                                      | syntaxin 2                                                                | STX2       |
|                                      | RANBP2-like and GRIP domain containing 5                                  | RGPD5      |
|                                      | transforming, acidic coiled-coil containing protein 1                     | TACC1      |
|                                      | sorting nexin 24                                                          | SNX24      |
|                                      | WAS protein homology region 2 domain containing 1                         | WHDC1      |
| <b>Signaling/Transcription</b>       |                                                                           |            |
|                                      | coiled-coil domain containing 50                                          | CCDC50     |
|                                      | RAB11 family interacting protein 2 (class I)                              | RAB11FIP2  |
|                                      | high mobility group AT-hook 1                                             | HMGA1      |
|                                      | PHD finger protein 2                                                      | PHF2       |
|                                      | RAB11 family interacting protein 1 (class I)                              | RAB11FIP1  |
|                                      | dishevelled associated activator of morphogenesis 2                       | DAAM2      |
|                                      | cholinergic receptor, nicotinic, alpha 1 (muscle)                         | CHRNA1     |

|                          |                                                                          |           |
|--------------------------|--------------------------------------------------------------------------|-----------|
|                          | protein tyrosine phosphatase, receptor type, E                           | PTPRE     |
|                          | acidic (leucine-rich) nuclear phosphoprotein 32 family, member B         | ANP32B    |
|                          | similar to Acidic leucine-rich nuclear phosphoprotein 32 family member B | LOC646791 |
|                          | A kinase (PRKA) anchor protein 13                                        | AKAP13    |
| <b>Anti-inflammatory</b> |                                                                          |           |
|                          | FK506 binding protein 5                                                  | FKBP5     |

## Supplemental Materials and Methods

**Determination of Mtb growth rates *in vitro*.** Mtb was grown to late log phase, washed twice in PBS and pelleted by centrifugation at low speed to remove clumps. The OD<sub>600</sub> was adjusted to 0.02 in 50 mL of complete 7H9 media and the growth of each strain was approximated by measuring the OD<sub>600</sub> every 24-48 hours.

**Generation of human primary macrophages and immature dendritic cells.** Total human peripheral blood mononuclear cells (PBMCs) were obtained as buffy coats from the American Red Cross, Oakland, CA. PBMCs were prepared by sedimentation of erythrocytes with Dextran T500 and separation over a Ficoll-Hypaque gradient. Total monocytes were obtained by negative isolation using Dynal Monocyte MyPure Negative Isolation Kit (Invitrogen) and cultured in AIM-V media supplemented with 1% human AB serum and 20-50 ng mL<sup>-1</sup> of M-CSF to generate macrophages or 500U mL<sup>-1</sup> IL-4 and 1000U mL<sup>-1</sup> GM-CSF to generate hiDCs. Media was replaced on days 2 and 4 of culture to replenish growth factors.

**SL-1 purification.** Approximately 5 g of  $\gamma$ -irradiated Mtb H37Rv whole cells (Colorado State University) were extracted in 100mL chloroform: methanol (1:1, v/v) at room temperature for 2 h. The organic layer was filtered 3 times by vacuum filtration, concentrated, and further partitioned between chloroform and water to constitute the total Mtb lipid extract. 40 mg of lipid extract was resuspended in chloroform/methanol (4:1, v/v) and passed over an anion-exchange column (AG4-X4 resin, 100–200 mesh, biotechnology grade, free-base form, Bio-RAD) that was pre-charged with chloroform/methanol/acetic acid (400:100:0.6, v/v). The column was washed with chloroform/methanol (4:1, v/v) and binders were eluted using a gradient of 2–5 mM triethylamine in chloroform/methanol (4:1, v/v). Fractions were mixed (1:1, v/v) with matrix solution (10 mg ml<sup>-1</sup> 2-[4-Hydroxyphenylazo] benzoic acid) and analyzed by matrix assisted laser desorption ionization time-of-flight mass spectrometry (MALDI-TOF MS, Applied Biosystems Voyager DE Pro). Fractions containing SL-1 were pooled and further purified by HPLC on a silica column (Varian Microsorb 100, particle size 5 $\mu$ m). Prior to injection, the column was first equilibrated in chloroform/methanol (98:2, v/v) and SL-1 was eluted with a 2-27% methanol gradient over 30 minutes. Fractions were collected and analyzed for purity by MALDI as well as by TLC using a 60:12:1 (v/v) chloroform: methanol: water solvent system.

**Stimulation of leukocytes with SL-1, SL-A, or LPS.**  $4 \times 10^5$  hiDCs, human primary macrophages, THP-1, or RAW264.7 cells were treated with  $20\mu\text{g mL}^{-1}$  SL-1,  $20\mu\text{g mL}^{-1}$  SL-A that had been dissolved in petroleum ether and allowed to evaporate off the bottom of a cell culture dish or  $20\text{ng mL}^{-1}$  LPS as indicated. After 24 hours, the amount of TNF elicited by each cell type was analyzed by ELISA according to the manufacturer's recommendations (BD Bioscience).

### ***ΔpapA2* Antimicrobial Peptide Susceptibility**

The construction of *ΔpapA2* in the Erdman strain of Mtb was reported in (1). For complementation of *ΔpapA2*, the *papA2* gene was cloned from Mtb into the integrating mycobacterial expression vector pMV306 under the control of its putative endogenous promoter (2). This plasmid was electroporated into *ΔpapA2*, and transformants were selected on kanamycin-containing plates. Sensitivity of Mtb to antimicrobial peptides was assayed as previously described (3). Briefly, Mtb was grown to late-log phase, washed in PBS, and pelleted by centrifugation at low speed to remove clumps. Cells ( $2 \times 10^6$ ) of each strain were exposed to the indicated concentration of LL-37 (AnaSpec) dissolved in RPMI: water (1:4, v/v) at 37 °C. After three days, bacteria were plated on solid agar to enumerate the number of viable bacteria by cfu counts.

### **Microarray Preparation, Array Hybridizations, and Analysis**

Microarray sample preparation, labeling, and array hybridizations were performed according to standard protocols from the UCSF Shared Microarray Core Facilities and Agilent Technologies (<http://www.arrays.ucsf.edu> and <http://www.agilent.com>). RNA was amplified and labeled with Cy3-CTP using the Agilent low RNA input fluorescent linear amplification kits following the manufacturer's protocol. Labeled cRNA was assessed using the Nandrop ND-100 (Nandrop Technologies, Inc.), and equal amounts of Cy3 labeled target were hybridized to Agilent whole human genome 4x44K arrays. Arrays were scanned using the Agilent microarray scanner and raw signal intensities were extracted with Feature Extraction v9.1 software. The dataset was normalized using the *quantile* normalization method that is proposed by Bolstad et al. (4). No background subtraction was performed, and the median feature pixel intensity was used as the raw signal before normalization. A small number of probes (245) have replicate spots, and these were summarized by taking the median intensity. A linear model was fit to the comparison to estimate the mean M values and calculated moderated t-statistic, B statistic, false discovery rate and p-value for each gene for the comparison of interest. All procedures were carried out using functions in the R package *limma* in *Bioconductor* (5,6).

### **Supplemental References**

1.Kumar, P., Schelle, M. W., Jain, M., Lin, F. L., Petzold, C. J., Leavell, M. D., Leary, J. A., Cox, J. S., and Bertozzi, C. R. (2007) PapA1 and PapA2 are acyltransferases essential for the biosynthesis of the Mycobacterium tuberculosis virulence factor sulfolipid-1, *Proc Natl Acad Sci U S A* 104, 11221-11226.



2. Stover, C. K., de la Cruz, V. F., Fuerst, T. R., Burlein, J. E., Benson, L. A., Bennett, L. T., Bansal, G. P., Young, J. F., Lee, M. H., Hatfull, G. F., and et al. (1991) New use of BCG for recombinant vaccines, *Nature* 351, 456-460.
3. Liu, P. T., Stenger, S., Li, H., Wenzel, L., Tan, B. H., Krutzik, S. R., Ochoa, M. T., Schaubert, J., Wu, K., Meinken, C., Kamen, D. L., Wagner, M., Bals, R., Steinmeyer, A., Zugel, U., Gallo, R. L., Eisenberg, D., Hewison, M., Hollis, B. W., Adams, J. S., Bloom, B. R., and Modlin, R. L. (2006) Toll-like receptor triggering of a vitamin D-mediated human antimicrobial response, *Science* 311, 1770-1773
4. Bolstad BM, Irizarry RA, Astrand M, Speed TP (2003) A comparison of normalization methods for high density oligonucleotide array data based on variance and bias. *Bioinformatics* 19:185-193.
5. Gentleman, R. C., Carey, V. J., Bates, D. M., Bolstad, B., Dettling, M., Dudoit, S., Ellis, B., Gautier, L., Ge, Y., Gentry, J., Hornik, K., Hothorn, T., Huber, W., Iacus, S., Irizarry, R., Leisch, F., Li, C., Maechler, M., Rossini, A. J., Sawitzki, G., Smith, C., Smyth, G., Tierney, L., Yang, J. Y., and Zhang, J. (2004) Bioconductor: open software development for computational biology and bioinformatics, *Genome biology* 5, R80.
6. Smyth, G. K. (2004) Linear models and empirical bayes methods for assessing differential expression in microarray experiments, *Statistical applications in genetics and molecular biology* 3, Article3.
